# Supplementary material
Source: PubMed Central journal article supplement (PMC3099689)
Supplement: supp_M110.190769_jbc.M110.190769-1.pdf [file supp_M110.190769_jbc.M110.190769-1.pdf]

**Supplementary Table: PCR primers and shRNA oligonucleotides used**

| <b>Primer name</b>   | <b>Sequence 5'→3'</b>                                            |
|----------------------|------------------------------------------------------------------|
| 5'NAKSaII            | TCCCCGCGGAAG AAGTTTTTCGACTCCCGG                                  |
| 3'NAKRI              | GGA ATTCCAGGAGAATTGCCTGAACCCGG                                   |
| K74A forward         | GATGAAATGTGCCTTGCA CGCATGTTTGTCAAT                               |
| DPF forward          | CTTCTAAGCGTGTCTGCTGCTGCCATTCCTCTTCAAGTAC                         |
| 3'NAK631             | GGAATTCTCACCCAGCACGTTGGGTTTTGGG                                  |
| shAAK1 forward       | GATCCCCGTGCTCATTCTGATGGACTTTCAAGAGAAGTCCATCAGAATGAGCACTTTTTGGAAA |
| shAAK1 reverse       | AGCTTTTCAAAAAGTGCTCATTCTGATGGACTCTTCAAAGTCCATCAGAATGAGCACGGG     |
| shNumb forward       | GATCCCCGCAAAGCTTCAGGAGAATTCAAGAGATTCTCCTGAAGCTTTGCCGTTTTGGAAA    |
| shNumb reverse       | AGCTTTTCAAAAACGGCAAAGCTTCAGGAGAATCTCTTGAATTCTCCTGAAGCTTTGCCGGGG  |
| shscrambled- forward | GATCCCCGATTCTCAGGGTATGTCTTTCAAGAGAAGACATACCCTGAGGAATCTTTTTGGAAA  |
| shscrambled- reverse | AGCTTTTCAAAAAGATTCTCAGGGTATGTCTTCTTCAAAGACATACCCTGAGGAATCGGG     |
| shmutated forward    | GATCCCCGTGCTCATATTAATGGACTTTCAAGAGAAGTCCATTAATATGAGCACTTTTTGGAAA |
| shmutated reverse    | AGCTTTTCAAAAAGTGCTCATATTAATGGACTTCTTCAAAGTCCATTAATATGAGCACGGG    |
