# Supplementary material
Source: PubMed Central journal article supplement (PMC3099689)
Supplement: supp_M110.190769_jbc.M110.190769-3.pdf [file supp_M110.190769_jbc.M110.190769-3.pdf]

## Supplemental Figure S2

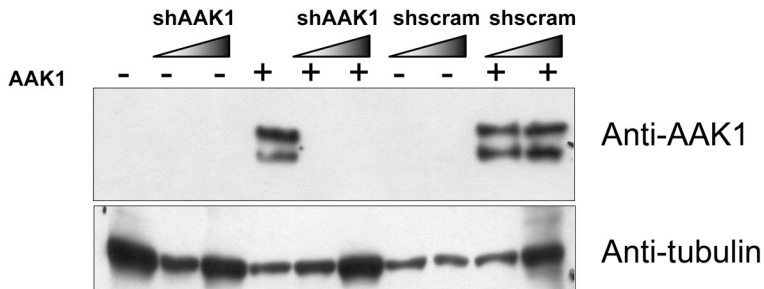

**Figure S2 (in association with Figure 6B): Effects of shAAK1 and scrambled shRNA (shscram) on AAK1 expression.**

UN1 cells were transiently transfected with the same amount of plasmid encoding AAK1 (+) and shAAK1 or the corresponding scrambled shRNA in increasing amounts (shscram) as indicated. AAK1 expression was monitored 48h after transfection with an anti-AAK1 antibody. In these cells, the endogenous AAK1 could not be detected with this antibody. Anti- $\beta$  Tubulin was used as a loading control. shAAK1 efficiently knocked down AAK1 in these cells while the scrambled shRNA (as well as the mutated shAAK1, shmutated, data not shown) did not.
